# Supplementary material
Source: PubMed Central journal article supplement (PMC4243054)
Supplement: NIHMS638997-supplement-2.pdf [file NIHMS638997-supplement-2.pdf]

**A****DCV: Drosophila C virus (9,264pb ssRNA (+) strand virus)**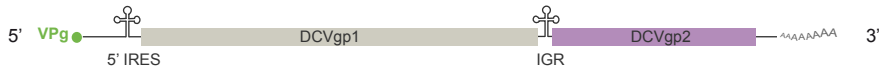**CrPV: Cricket Paralysis virus (9,185pb ssRNA (+) strand virus)**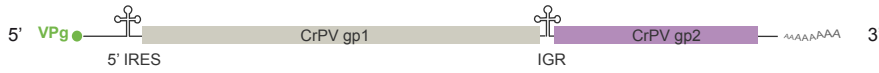**VSV: Vesicular stomatitis Indiana virus (11,161pb ssRNA (-) strand virus)**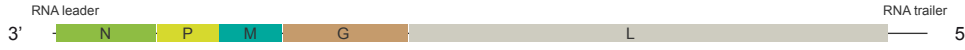**FHV: Flock House virus (3,107pb RNA1 and 1,400bp RNA2 ssRNA (+) strand virus)**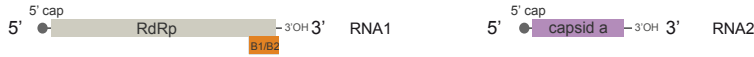**HCV: Hepatitis C virus (9,678pb ssRNA (+) strand virus)**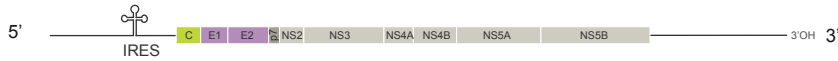**B**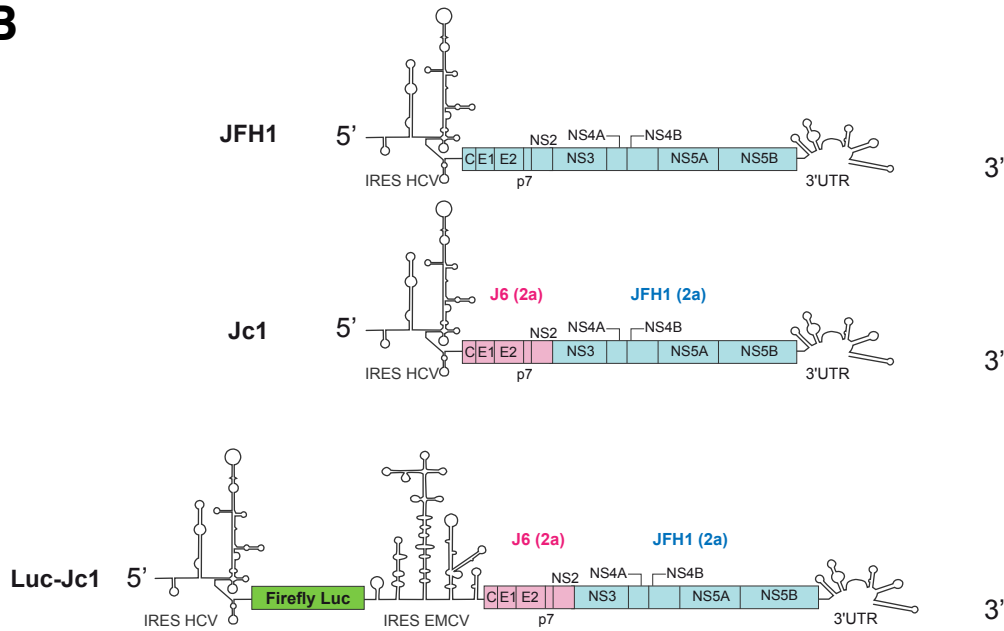**C**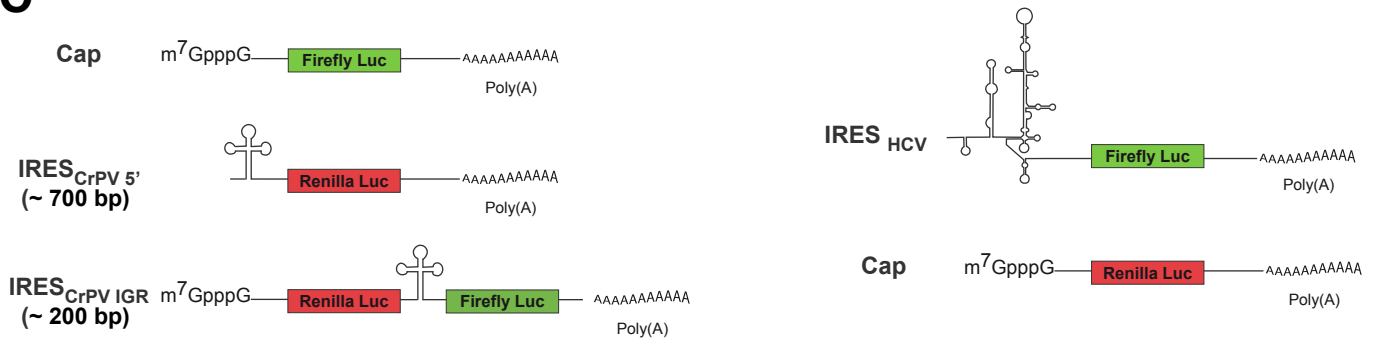**Figure S2**  
Majzoub *et al.*
