# Supplementary material
Source: PubMed Central journal article supplement (PMC4243054)

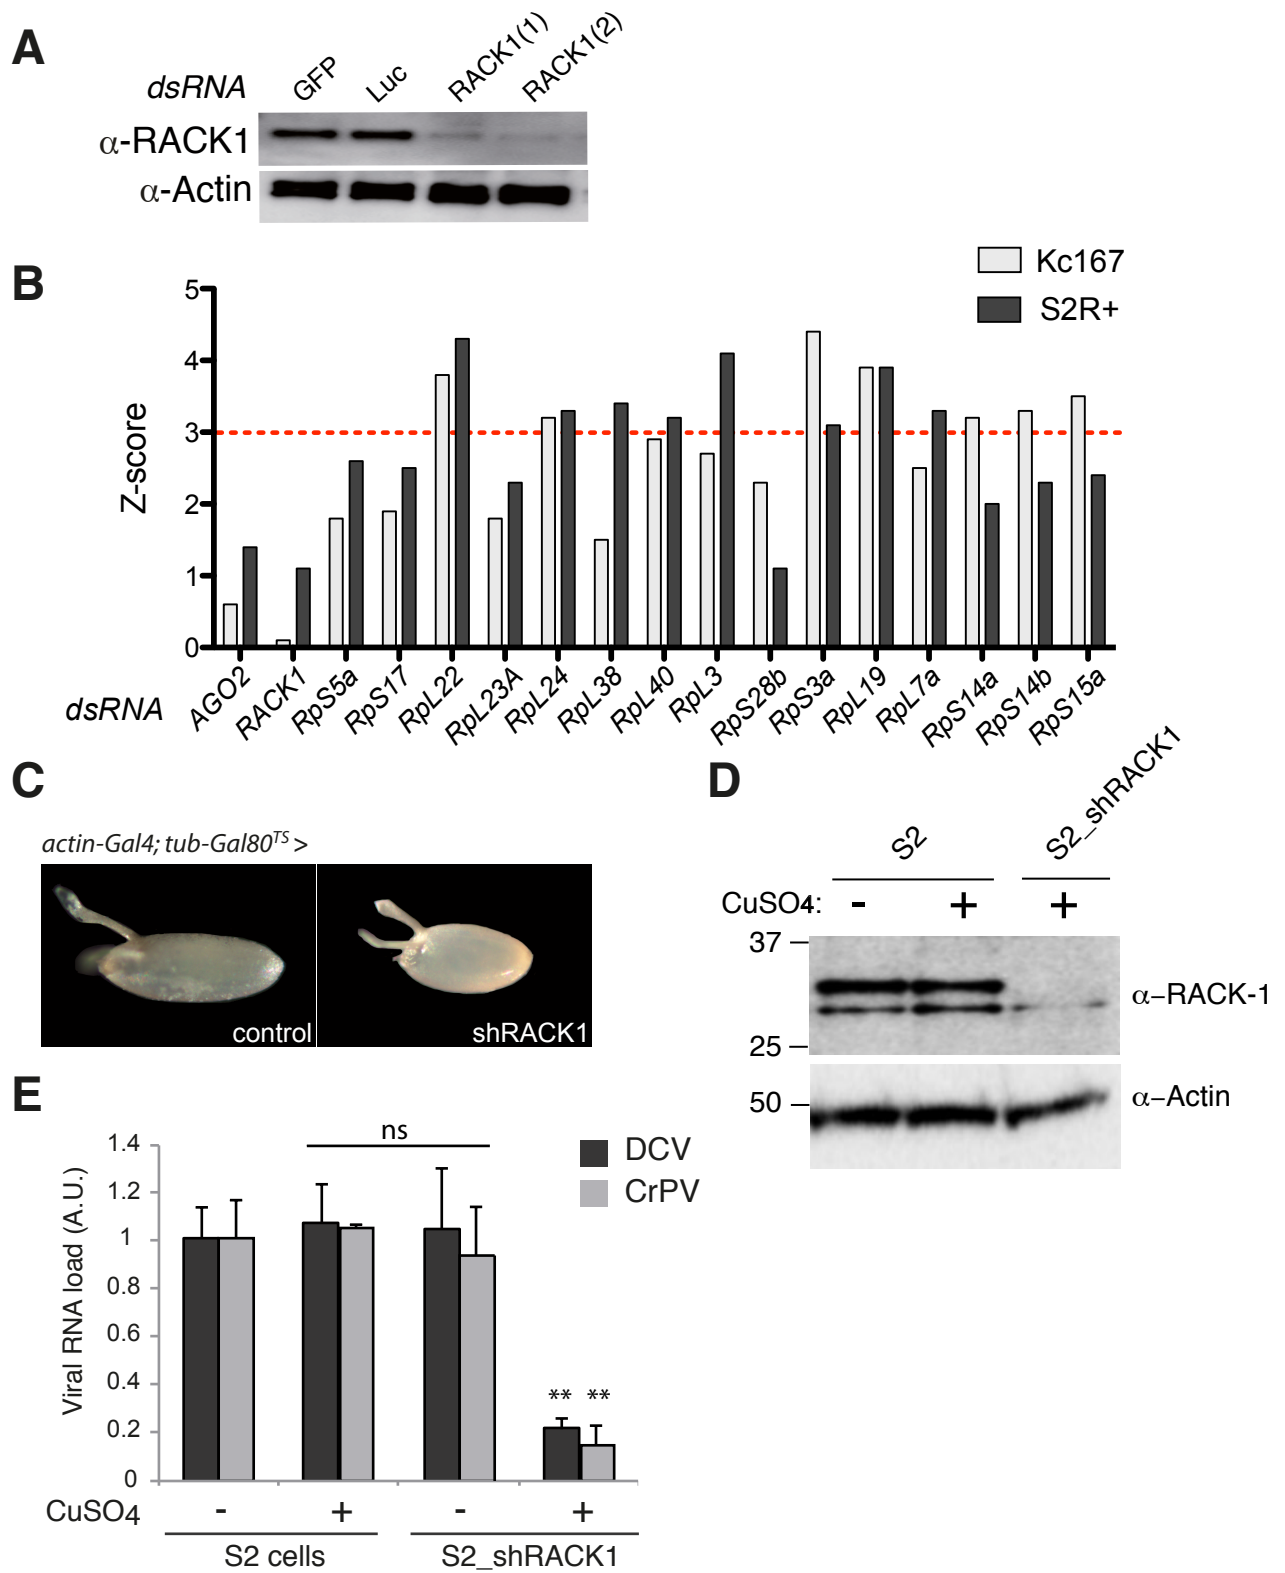

**Figure S1**  
Majzoub *et al.*

Supplement: NIHMS638997-supplement-1.pdf [file NIHMS638997-supplement-1.pdf]

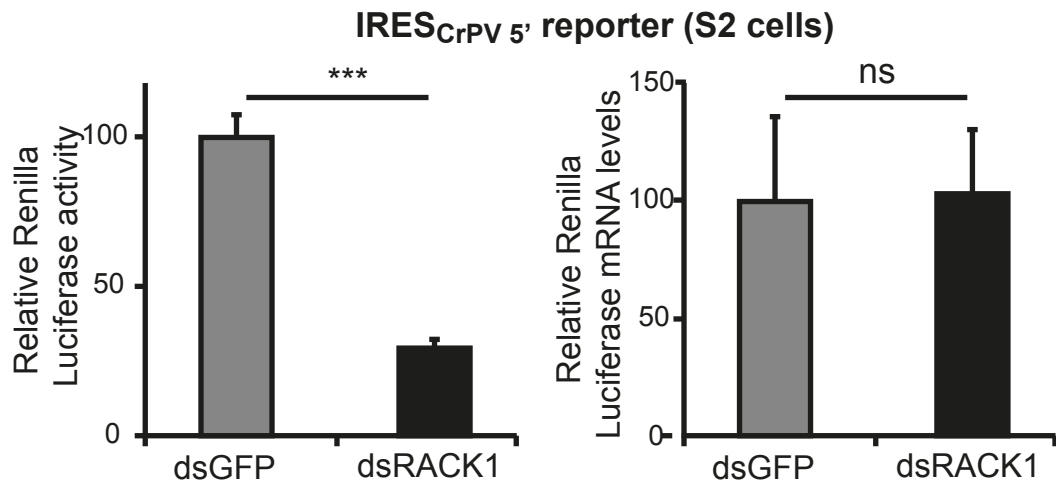

**Figure S3**  
Majzoub *et al.*

Supplement: NIHMS638997-supplement-3.pdf [file NIHMS638997-supplement-3.pdf]

**A**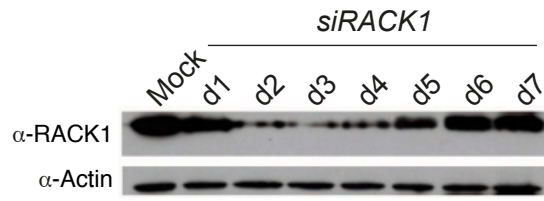**B**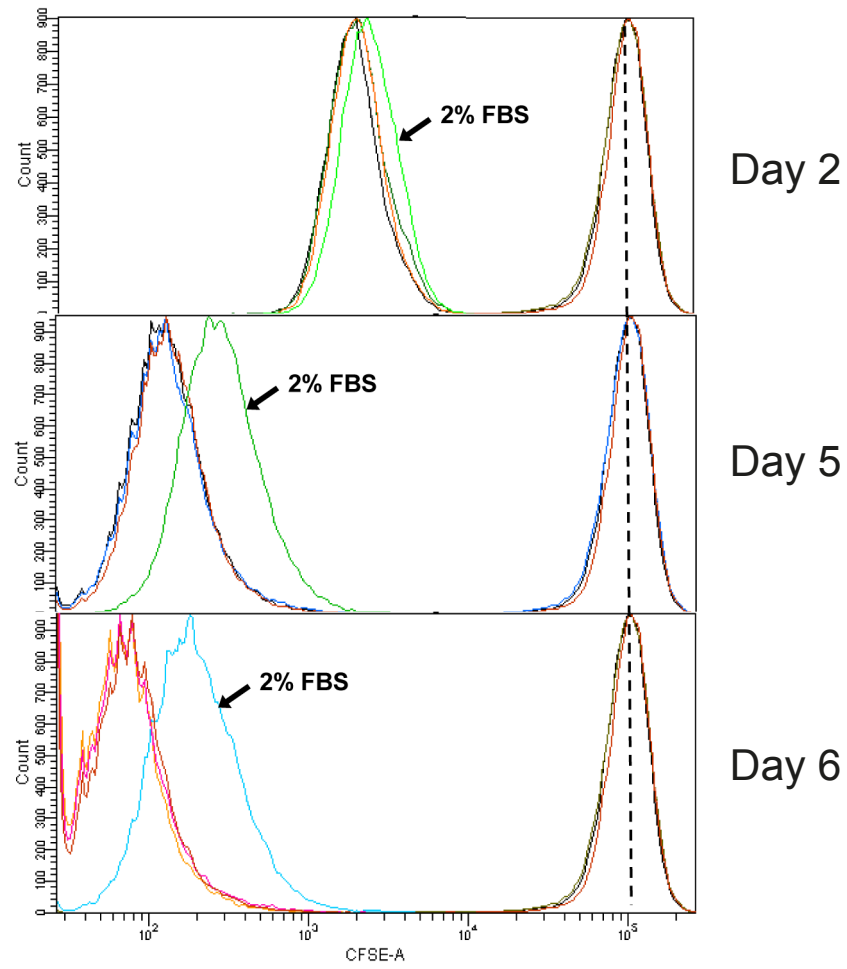

Supplement: NIHMS638997-supplement-4.pdf [file NIHMS638997-supplement-4.pdf]

**A**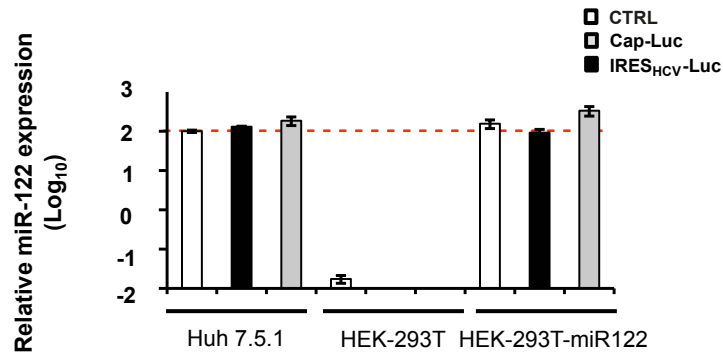**B**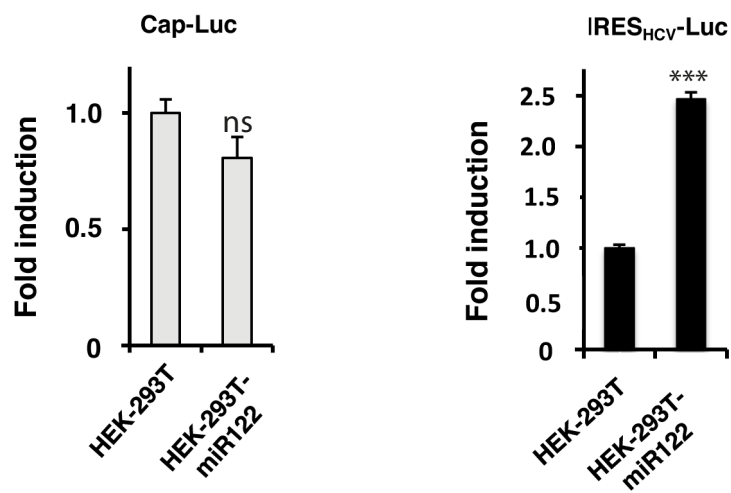

Supplement: NIHMS638997-supplement-5.pdf [file NIHMS638997-supplement-5.pdf]

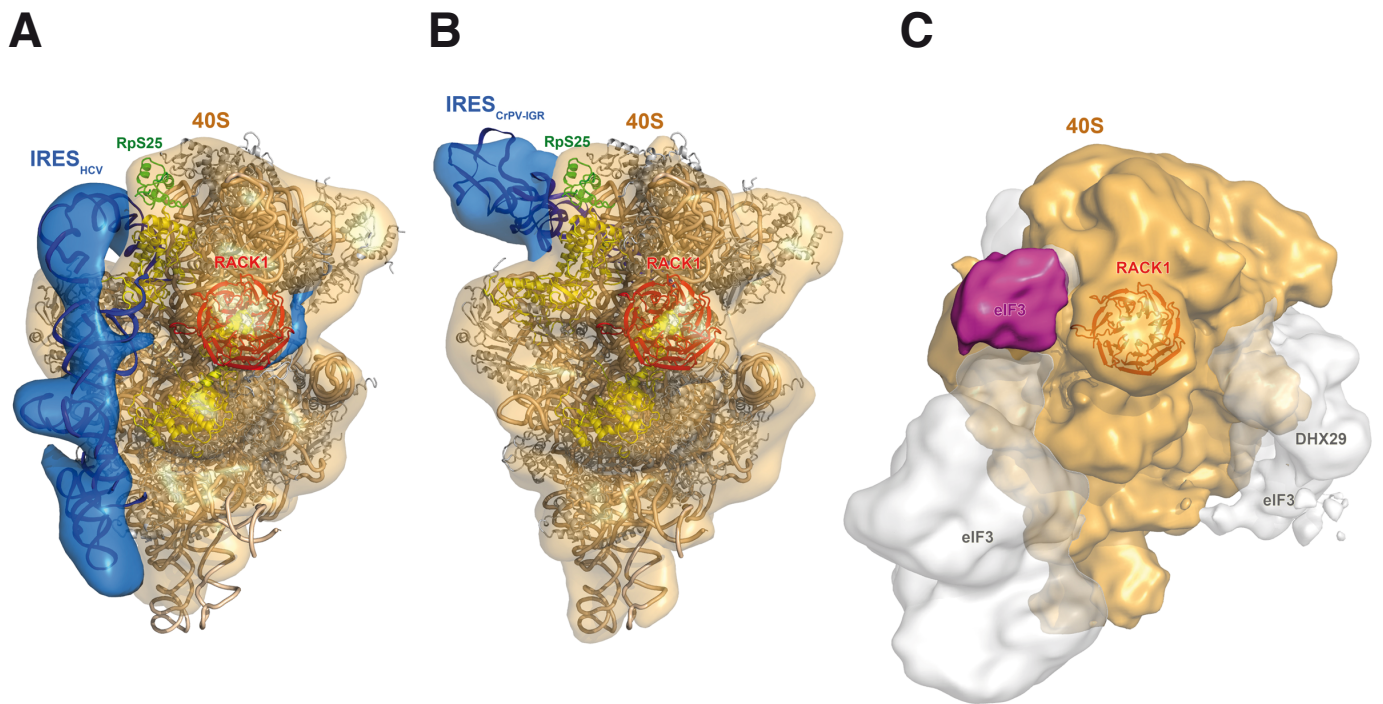

**Figure S6**  
Majzoub *et al.*

Supplement: NIHMS638997-supplement-6.pdf [file NIHMS638997-supplement-6.pdf]
